# Supplementary material
Source: Research Square preprint supplement (doi:10.21203/rs.3.rs-7414904/v1)
Supplement: Supplementary file 1 [file 9a147a2f2fccd6a35d960a7d.docx]

**Supplementary**

Temporal Trend of Dust Storm Events and Ambient Air Particulate Matter (PM2.5 and PM10) in Iran’s Metropolises, 2011–2022

**Mohammad Khanizadeh 1, †, Aliakbar Hassanpour 1, †, Niloufar Borhani Yazdi 1, Milad Malekpour 1, Sadegh Niazi2,3, Kazem Naddafi 1,4, Mansour Shamsipour 5, Fatemeh Momeniha 1,6, Arman Abdipour 7, Ensieh Sharafkhani 7, Faramarz Azimi 8, Masoumeh Hashamfirooz 1, Elahe Noruzzade 1, and Mohammad Sadegh Hassanvand 1,4,***

1 Department of Environmental Health Engineering, School of Public Health, Tehran University of Medical Sciences, Tehran, Iran

2 International Laboratory for Air Quality and Health (ILAQH), Queensland University of Technology (QUT), QLD, Australia

3 School of Science, Western Sydney University, Kingswood, NSW, Australia

4 Center for Air Pollution Research (CAPR), Institute for Environmental Research (IER), Tehran University of Medical Sciences, Tehran, Iran

5 Department of Research Methodology and Data Analysis, Institute for Environmental Research, Tehran University of Medical Sciences, Tehran, Iran

6 Center for Solid Wast Management (CSWM), Institute for Environmental Research (IER), Tehran University of Medical Sciences, Tehran, Iran

7 Department of Earth and Atmospheric Sciences, University of Houston, USA

8 Environmental Health Research Center, Lorestan University of Medical Sciences, Khorramabad, Iran

**†** These authors contributed equally to this work.

***** Correspondence: [hassanvand@tums.ac.ir](mailto:hassanvand@tums.ac.ir), [mshasanvand@gmail.com](mailto:mshasanvand@gmail.com);

Based on the findings mentioned, different results can be obtained for each city.

**Annual PM10 concentration:**

1. The annual average concentration of PM10 in the open air of Tehran (overall average of valid stations) from 2011 to 2022 has ranged between 94.4 and 71 µg/m3, which has consistently been about 4.5 to 6.5 times higher than the annual values recommended by the new WHO guidelines (15 µg/m3).
2. The annual average concentration of PM10 in the ambient air of Mashhad (average of all reputable stations) from 2014 to 2022 has ranged between 56.9 and 83.4 µg/m3, which has consistently been about 3.8 to 5.6 times higher than the annual values recommended by the new WHO guidelines (15 µg/m3).
3. The annual average concentration of PM10 in the open air of Tabriz (average of all valid stations) from 2014 to 2022 has ranged from 50.5 to 131.7 µg/m3, which has consistently been about 3.4 to 8.8 times higher than the annual values recommended by the new WHO guidelines (15 µg/m3).
4. The annual average concentration of PM10 in the open air of Ilam city (the average of all valid stations) from 2013 to 2022 has ranged from 44.2 to 74.6 µg/m3, which has consistently been about 3 to 5 times higher than the annual values recommended by the new WHO guidelines (15 µg/m3).
5. The annual average concentration of PM10 in the ambient air of Kermanshah city (average of all valid stations) from 2011 to 2022 has ranged from 59.7 to 116.6 µg/m3, which has consistently been 4 to 7.8 times higher than the annual values recommended by the new WHO guidelines (15 µg/m3).
6. The annual average concentration of PM10 in the open air of Yazd (the average of all valid stations) from 2013 to 2022 has ranged between 135.8 and 84.6 µg/m3, which is consistently higher and approximately 5.6 to 9 times the annual values of the new WHO guideline (15 µg/m3).
7. The annual average concentration of PM10 in the open air in the city of Zahedan (average of all valid stations) from 2011 to 2022 has data only for the years 2017 and 2018, ranging from 80.6 to 82.8 µg/m3, which is consistently more than approximately 5.38 to 5.52 times the annual values of the new WHO guideline (15 µg/m3).
8. The annual average concentration of PM10 in the open air of Shiraz (the average of all valid stations) from 2013 to 2022 has ranged from 31.9 to 76.5 µg/m3, which is consistently higher and approximately 2.1 to 5.1 times the annual values of the new WHO guideline (15 µg/m3).
9. The annual average concentration of PM10 in the open air of Ahvaz city (overall average of valid stations) from 2013 to 2022 has ranged between 113.3 and 179.8 µg/m3, which is consistently higher and about 7.6 to 12 times the annual values of the new WHO guidelines (15 µg/m3).

The minimum annual average concentration of PM10 particulates in Ahvaz's urban environment from 2013 to 2022 was 113.3 µg/m3, a 7.6-fold increase compared to WHO guidelines (15 µg/m3). Also, the daily average concentration levels fluctuated between 1126.83 and 26.91 µg/m3 for PM10 and 405.54 to 14.88 µg/m3 for PM2.5 during 2022 in Ahvaz (refer to Tables S11 and S12). In the year 2022, the municipality of Ahvaz as the city with the highest annual average concentration of PM10 and PM2.5 pollutants among all studied areas, documented a total of 359 days during which PM10 pollutant concentrations exceeded the newly established daily thresholds delineated by the World Health Organization (45 µg/m3), as well as 297 days surpassing the national standard of Iran (150 µg/m3), representing 98.5% and 81.37% of the recorded days for that year, respectively. Furthermore, in this same temporal frame, Ahvaz experienced 289 days where PM2.5 concentrations were above the newly recommended daily limits set forth by the World Health Organization (15 µg/m3) and 282 days exceeding Iran's national benchmark (35 µg/m3), which correspond to 99.65% and 97.24% of the days for which data was available throughout the year, respectively. The findings presented herein robustly suggest a significantly detrimental state of air quality during the final year of the observational period within the city of Ahvaz, such that in this specific year, in accordance with World Health Organization (WHO) guidelines, Ahvaz was recorded to possess merely one day categorized as healthy with respect to PM2.5 pollution and six days designated as healthy concerning PM10 pollution (TABLE S5 & S6).

As mentiond in the study, the lowest annual mean concentration of PM10 and PM2.5 pollutants was recorded in the city of Shiraz for PM10 at 27.7 µg/m3 in 2021 and in the city of Kermanshah for PM2.5 at 16.5 µg/m3 in the same year, respectively. In this year, the annual mean concentrations of PM10 and PM2.5 in the urban area of Shiraz were documented to be approximately 31.9 and 27.7 µg/m3, respectively, whereas in Kermanshah, the corresponding values were about 60.5 and 16.5 µg/m3 as the lowest annual mean concentration of PM10 and PM2.5 pollutants. Also in this year, the concentration of PM2.5 in the city of Shiraz was persistently elevated, approximately 5.54 times the annual thresholds outlined in the new WHO guidelines (5 µg/m3), and also consistently exceeded, by about 2.3 times, the national air quality standards of Iran (12 µg/m3). For PM10, the concentration also remained consistently elevated, approximately 2.65 times the annual values established by the new WHO guidelines (15 µg/m3). In the urban environment of Kermanshah, the concentration levels of PM2.5 are consistently elevated, approximately 3.3 times greater than the annual values prescribed by the recent World Health Organization guidelines (5 µg/m3), and also persistently exceed, by about 1.37 times, the national standards established in Iran (12 µg/m3). Regarding PM10, the concentration levels are similarly elevated, approximately 4.03 times the annual values delineated by the recent WHO guidelines (15 µg/m3) (TABLE S1 & S2). The research indicates that the daily average concentration fluctuations in Shiraz and Kermanshah during the year 2021 ranged from 6.02 to 1000 µg/m3 in Shiraz and from 13.61 to 328.11 µg/m3 in Kermanshah for PM10, while for PM2.5, the concentrations varied from 8.84 to 115.22 µg/m3 in Shiraz and from 5.15 to 241.71 µg/m3 in Kermanshah. (TABLE S11 & S12).

In the year 2021, the municipality of Shiraz encountered 16 days in which concentrations of PM10 pollutants surpassed the newly established daily thresholds as prescribed by the World Health Organization (45 µg/m3) and experienced 11 days above the national regulatory limit of Iran (150 µg/m3), which correspondingly represent 6.17% and 4.25% of the total days with recorded data for that year. Furthermore, during this period, Shiraz recorded 271 days in which PM2.5 concentrations exceeded the recently instituted daily guidelines put forth by the WHO (15 µg/m3) and 188 days that were above the national standard of Iran (35 µg/m3), accounting for 96.2% and 66.67% of the total days with available data for the year, respectively. In the year 2021, Kermanshah documented a total of 235 days during which PM10 pollutant levels surpassed the newly established daily thresholds prescribed by the World Health Organization (45 µg/m3) and 65 days exceeding Iran's national standard (150 µg/m3), thereby constituting 64.5% and 17.81% of the days with available data for that year, respectively. In the same year, the concentration of PM2.5 pollutants in Kermanshah exceeded the newly instituted daily guidelines set forth by the World Health Organization (15 µg/m3) for a duration of 116 days and surpassed Iran's national threshold (35 µg/m3) for 70 days, representing 32.3% and 19.44% of the days with documented data for that year, respectively (TABLE S3-S8).

**Annual PM2.5 concentration:**

1. The annual average concentration of PM2.5 in the open air of Tehran (the overall average of all valid stations) from 2011 to 2022 has ranged between 39.3 and 28 µg/m3, which has consistently been more than approximately 5.5 to 8 times the annual values of the new WHO guidelines (5 µg/m3) and 2.5 to 3 times the national standard (12 µg/m3).
2. The annual average concentration of PM2.5 in the open air in the city of Mashhad (average of all valid stations) from 2013 to 2022 has ranged from 24.9 to 35.3 µg/m3, which is consistently higher and about 5 to 7 times the annual values of the new WHO guideline (5 µg/m3) and about 2 to 3 times the national standard (12 µg/m3).
3. The annual average concentration of PM2.5 in the open air in the city of Tabriz (average of all valid stations) from 2013 to 2022 has ranged from 18.5 to 35.4 µg/m3, which is consistently higher and about 4 to 7 times the annual values of the new WHO guideline (5 µg/m3) and approximately 1.5 to 3 times the national standard (12 µg/m3).
4. The annual average concentration of PM2.5 in the open air in the city of Ilam (average of all valid stations) from 2011 to 2022 was only available for the year 2019, and this amount was 22.6 µg/m3, which is more than 4.52 times the annual values of the new WHO guidelines (5 µg/m3) and also more than 1.88 times the annual values of the national standard (12 µg/m3).
5. The annual average concentration of PM2.5 in the open air of Kermanshah city (overall average of all valid stations) during the years 2020 to 2022 has ranged from 16.5 to 23.8 µg/m3, which has consistently been about 3.3 to 4.8 times higher than the new WHO annual guideline (5 µg/m3) and also consistently higher, approximately 1.4 to 2 times the national standard (12 µg/m3).
6. The annual average concentration of PM2.5 in the open air in Yazd city (the overall average of all valid stations) was only available for the year 2022, and it was 27.5 µg/m3, which is more than 5.5 times the annual values of the new WHO guidelines (5 µg/m3) and approximately 2.29 times the national standard (12 µg/m3).
7. Air quality monitoring stations in the city of Zahedan have lacked valid data for the PM2.5 pollutant from 2011 to 2022.
8. The annual average concentration of PM2.5 in the open air in the city of Shiraz (overall average of all valid stations) during the years 2018 to 2022 has ranged from 27.7 to 43.4 µg/m3, which has consistently been about 5.5 to 8.7 times higher than the new WHO annual guideline (5 µg/m3) and also consistently higher, approximately 2.3 to 3.6 times the national standard (12 µg/m3).
9. The annual average concentration of PM2.5 in the open air of Ahvaz (average of all valid stations) from 2014 to 2022 has ranged from 57.2 to 38 µg/m3, which is consistently higher and approximately 7.6 to 11.5 times the annual values of the new WHO guidelines (5 µg/m3). It is also consistently higher and about 3.2 to 4.8 times the national standard (12 µg/m3).

As mentioned in the study, the highest daily average concentration levels of PM10 and PM2.5 from the years 2011 to 2022 across the examined cities were associated with Tabriz during the spring season of 2016 for PM10 and with Ahvaz in the spring of 2022 for PM2.5. In the year 2016, Tabriz recorded data for PM10 and PM2.5 on 359 and 363 days, respectively, exhibiting a daily average concentration range of 7.9 to 1464 µg/m3 for PM10 and a concentration range of 8.68 to 113.07 µg/m3 for PM2.5 (TABLE S11 & S12). During this year, the city experienced 190 days where PM10 concentrations surpassed the newly established WHO guideline for daily average concentration (45 µg/m3), which corresponds to 53 percent of the days with available data. In the case of PM2.5, this statistic indicated 297 days exceeding the new WHO guideline for daily average concentration (15 µg/m3), representing 82 percent of the days with recorded data. For particulate matter with a diameter of 2.5 micrometers or less (PM2.5), the recorded metric was 297 days exceeding the revised World Health Organization (WHO) guideline for daily average concentration (15 µg/m3), which constitutes 82 percent of the days for which data was available. In the same calendar year, this urban area recorded 77 days surpassing the national regulatory limit for particulate matter with a diameter of 10 micrometers or less (PM10) (150 µg/m3), representing 21.6 percent of the days for which data was collected. With respect to PM2.5, the count was 202 days that exceeded the national standard (35 µg/m3), accounting for 55.5 percent of the days with available data (TABLE S3-S8).

Also, in the year 2016, the city of Tabriz exhibited an annual average concentration of 79.3 µg/m³ for PM10, which is 5.3 times greater than the newly established WHO annual concentration guideline (15 µg/m³). Regarding PM2.5, the concentration recorded was 26.93 µg/m³, approximately 5.39 times the recommended guideline values (5 µg/m³) and around 2.25 times the national standard established by Iran (12 µg/m³) (TABLE S1 & S2).

In the year 2022, the city of Ahvaz recorded data for particulate matter with diameters of 10 micrometers or less (PM10) and 2.5 micrometers or less (PM2.5) for 365 and 290 days, respectively, exhibiting a daily mean concentration varying from 26.91 to 1126.83 µg/m3 for PM10 and a variation from 14.88 to 405.54 µg/m3 for PM2.5 (TABLE S11 & S12). During this period, the city observed PM10 data for 359 days, which corresponds to 98.4% of the total days with available data, surpassing the average daily concentration threshold established by the recent World Health Organization guidelines (45 µg/m3). For PM2.5, this figure was recorded as 289 days exceeding the mean daily concentration established by the updated WHO guideline (15 µg/m3), which represented 99.65% of the days for which data was available. Furthermore, with respect to PM10, in accordance with Iran's national standard (150 µg/m3), this urban area witnessed 297 days surpassing the standard within the specified year, which corresponds to 81.37 percent of the days with recorded data. Pertaining to PM2.5, this figure correlates to 282 days above the national standard (35 µg/m3), constituting 97.24 percent of the days for which data was collected (TABLE S3-S8). In the year 2022, Ahvaz recorded an annual mean concentration of PM10 at 164.08 µg/m³, which is 10.93 times greater than the revised WHO annual guideline (15 µg/m³). In relation to PM2.5, the recorded concentration was 57.25 µg/m³, which represents approximately 11.45 times the established guideline values (5 µg/m³) and roughly 4.77 times the national standard set by Iran (12 µg/m³) (TABLE S1 & S2).

**Daily PM10 concentration:**

1. The average daily concentration of PM10 in the open air of Tehran (overall average of valid stations) during the years 2011 to 2022 has ranged from 14.44 to 575.92 µg/m3, which is, in the best conditions, below the new daily guideline values set by the WHO (45 µg/m3) and, in the worst conditions, about 13 times higher than the guideline. Additionally, in the best conditions, it is below the national standard (150 µg/m3) and, in the worst conditions, about 4 times higher than the standard.
2. The average daily concentration of PM10 in the open air of Mashhad (the average of all valid stations) from 2014 to 2022 has ranged from 9.04 to 506.8 µg/m3, which in the best conditions is below the new daily guideline of the WHO (45 µg/m3) and in the worst conditions is about 11.25 times higher than the guideline. Additionally, in the best conditions, it is below the national standard (150 µg/m3) and in the worst conditions is about 3.38 times higher than the standard.
3. The average daily concentration of PM10 in the open air of Tabriz (overall average of valid stations) during the years 2015 to 2022 has ranged from 6 to 1464 µg/m3, which in the best conditions is below the new daily guideline of the WHO (45 µg/m3) and in the worst conditions is approximately 32.5 times above the guideline. Additionally, in the best conditions, it is below the national standard (150 µg/m3) and in the worst conditions is about 9.76 times above the standard.
4. The average daily concentration of PM10 in the open air of Ilam city (overall average of valid stations) from 2015 to 2022 has ranged from 5.01 to 763.8 µg/m3, which in the best conditions is below the new WHO daily guideline (45 µg/m3) and in the worst conditions is about 17 times the guideline. Additionally, in the best conditions, it is below the national standard (150 µg/m3) and in the worst conditions is about 5 times the standard.
5. The average daily concentration of PM10 in the open air of Kermanshah city (overall average of valid stations) from 2011 to 2022 has ranged from 9.8 to 953.64 µg/m3, which in the best conditions is below the new daily guideline of the WHO (45 µg/m3) and in the worst conditions is about 21 times the guideline. Additionally, in the best conditions, it is below the national standard (150 µg/m3) and in the worst conditions is about 6.4 times the standard.
6. The average daily concentration of PM10 in the open air of Yazd city (average of all valid stations) from 2013 to 2022 has ranged from 5.14 to 625.46 µg/m3, which in the best conditions is below the new WHO daily guideline (45 µg/m3) and in the worst conditions is about 14 times higher than the guideline. Additionally, in the best conditions, it is below the national standard (150 µg/m3) and in the worst conditions, it is about 4.17 times higher than the standard.
7. The average daily concentration of PM10 in the open air of Zahedan (the average of all valid stations) during the years 2017 to 2018 ranged from 8.16 to 413.36 µg/m3, which in the best conditions is below the new WHO daily guideline (45 µg/m3) and in the worst conditions is about 9.2 times the guideline. Additionally, in the best conditions, it is below the national standard (150 µg/m3) and in the worst conditions is about 2.8 times the standard.
8. The average daily concentration of PM10 in the open air of Shiraz (overall average of all valid stations) from 2013 to 2021 has ranged from 6.02 to 1000 µg/m3, which is, in the best conditions, below the new daily guideline of the WHO (45 µg/m3) and, in the worst conditions, about 22.2 times higher than the guideline. Additionally, in the best conditions, it is below the national standard (150 µg/m3) and, in the worst conditions, about 6.67 times higher than the standard.
9. The average daily concentration of PM10 in the open air of Ahvaz (the overall average of valid stations) from 2013 to 2022 has ranged from 16.61 to 1138.51 µg/m3, which is less than the new daily guideline of the WHO (45 µg/m3) under the best conditions, and in the worst conditions, it is about 25 times higher than the guideline. Additionally, under the best conditions, it is below the national standard (150 µg/m3), while in the worst conditions, it is approximately 7.6 times above the standard.

**Daily PM2.5 concentration:**

1. The average daily concentration of PM2.5 in the open air of Tehran (overall average of all valid stations) from 2011 to 2022 has ranged from 7.56 to 145.15 µg/m3, which in the best conditions is below the new daily guideline of the WHO (15 µg/m3) and in the worst conditions is about 9.7 times above the guideline. Additionally, in the best conditions, it is below the national standard (35 µg/m3) and in the worst conditions is about 4 times above the standard.
2. The average daily concentration of PM2.5 in the open air of Mashhad (average of all valid stations) from 2013 to 2022 has ranged from 7.56 to 279.9 µg/m3, which in the best conditions is below the new WHO daily guideline (15 µg/m3) and in the worst conditions is about 18.7 times the guideline. Additionally, in the best conditions, it is below the national standard (35 µg/m3) and in the worst conditions is about 8 times the standard.
3. The average daily concentration of PM2.5 in the open air of Tabriz (average of all valid stations) from 2011 to 2022 has ranged from 5.81 to 219.3 µg/m3, which in the best conditions is below the new WHO daily guideline (15 µg/m3) and in the worst conditions is about 14.6 times the guideline. Additionally, in the best conditions, it is below the national standard (35 µg/m3) and in the worst conditions, it is about 6.3 times the standard.
4. The average daily concentration of PM2.5 in the open air of Ilam city (the average of all valid stations) from 2011 to 2022 was only available for the year 2019, ranging from 91.67 to 8.88 µg/m3. In the best conditions, it was below the new WHO daily guideline (15 µg/m3), and in the worst conditions, it was about 6.1 times the guideline. Additionally, in the best conditions, it was below the national standard (35 µg/m3), and in the worst conditions, it was about 2.62 times the standard.
5. The average daily concentration of PM2.5 in the open air of Kermanshah city (the average of all valid stations) from 2011 to 2022 has only been available for the years 2020 to 2022, ranging from 5.15 to 279.51 µg/m3. In the best conditions, it is below the new WHO daily guideline (15 µg/m3), while in the worst conditions, it is about 18.6 times above the guideline. Additionally, in the best conditions, it is below the national standard (35 µg/m3), and in the worst conditions, it is about 8 times above the standard.
6. The average daily concentration of PM2.5 in the open air of Yazd city (average of all valid stations) from 2011 to 2022 was only available for the year 2022, ranging from 10.77 to 94.15 µg/m3. In the best conditions, it is below the new daily guideline of the WHO (15 µg/m3), while in the worst conditions, it is about 6.3 times higher than the guideline. Additionally, in the best conditions, it is below the national standard (35 µg/m3), and in the worst conditions, it is approximately 2.7 times higher than the standard.
7. Air quality monitoring stations in the city of Zahedan have lacked valid data for the PM2.5 pollutant from 2011 to 2022.
8. The average daily concentration of PM2.5 in the open air of Shiraz (the average of all valid stations) from 2011 to 2022 is only available for the years 2018 to 2022, ranging from 7.14 to 298.65 µg/m3. In the best conditions, it is below the new daily guideline of the WHO (15 µg/m3), while in the worst conditions, it is about 20 times higher than the guideline. Additionally, in the best conditions, it is below the national standard (35 µg/m3), and in the worst conditions, it is about 8.5 times higher than the standard.
9. The average daily concentration of PM2.5 in the open air of Ahvaz city (the average of all valid stations) from 2014 to 2022 has ranged from 405.54 to 9.42 µg/m3, which in the best conditions is below the new WHO daily guideline (15 µg/m3) and in the worst conditions is about 27 times the guideline. Additionally, in the best conditions, it is below the national standard (35 µg/m3) and in the worst conditions is approximately 11.6 times the standard.

In 2017, Ilam presented PM10 data for 295 days, exhibiting a daily average concentration range from 5.01 to 516.86 µg/m³ for PM10. (TABLE S11 & S12). Notably, this city did not possess valid daily PM2.5 data for the indicated year. During this same year, Ilam experienced PM10 levels on 198 days, which constitutes 67.12% of the days with data, surpassing the average daily concentration threshold established by the new WHO guideline (45 µg/m³). Moreover, with respect to PM10, in accordance with the national standards established by Iran (150 µg/m3), this urban area recorded 56 days exceeding the stipulated threshold during the specified year, which constitutes approximately 18.98 percent of the days for which data were available. (TABLE S5-S8).

Furthermore, in the year 2017, the annual mean concentration of PM10 in Ilam was recorded at 65.11 µg/m3, representing a value that is 4.34 times greater than the newly established annual concentration guideline set forth by the World Health Organization (15 µg/m3). (TABLE S1 & S2). In the year 2021, Kermanshah exhibited a daily average concentration of PM10 ranging from 13.61 to 328.11 µg/m3, while the concentration range for PM2.5 was observed to be between 5.15 and 241.71 µg/m3, derived from data collected over 365 and 360 days, respectively. (TABLE S11 & S12). During this particular year, the city experienced 235 days with recorded PM10 levels, which corresponds to 64.4% of the total days with available data, thereby surpassing the average daily concentration threshold stipulated by the new World Health Organization guideline (45 µg/m3). For PM2.5, this represented 116 days exceeding the average daily concentration established by the recent WHO guideline (15 µg/m3), which constituted 32.22% of the total days for which data was available. In the same calendar year, this municipality also encountered 65 days surpassing the national threshold for PM10 (150 µg/m3), translating to 17.81% of the days with recorded data. Regarding PM2.5, this figure corresponds to 70 days above the national criterion (35 µg/m3), making up 19.44% of the days with data available (TABLE S3-S8). In the year 2021, Kermanshah exhibited an annual mean concentration of PM10 at 60.48 µg/m3, which is 4.03 times greater than the newly established WHO guideline for annual concentration (15 µg/m³). For PM2.5, the concentration was recorded at 16.52 µg/m³, which is approximately 3.3 times the guideline values (5 µg/m³) and about 1.37 times the national standard of Iran (12 µg/m³) (TABLE S1 & S2).

TABLE S1: Average annual concentration of PM10 during the years 2011 to 2022 by city (µg/m3) (ND: NO DATA)

| **Average annual concentration of PM10** | | | | | | | | | |
| --- | --- | --- | --- | --- | --- | --- | --- | --- | --- |
| **Year** | **Tehran (1)** | **Tabriz (2)** | **Shiraz (3)** | **Ilam (4)** | **Kermanshah (5)** | **Mashhad (6)** | **Zahedan (7)** | **Yazd (8)** | **Ahvaz (9)** |
| **2011** | 89.22 | ND | ND | ND | 121.46 | ND | ND | ND | ND |
| **2012** | 86.00 | ND | ND | ND | ND | ND | ND | ND | ND |
| **2013** | 85.53 | ND | 76.51 | 71.65 | ND | ND | ND | 101.10 | 179.81 |
| **2014** | 75.80 | ND | 43.59 | 56.08 | ND | 76.23 | ND | 92.19 | 140.06 |
| **2015** | 76.52 | 50.51 | ND | 67.37 | 96.91 | 77.18 | ND | 98.93 | 153.52 |
| **2016** | 76.91 | 79.30 | ND | 63.54 | 91.34 | 79.33 | ND | 104.99 | 148.03 |
| **2017** | 83.66 | 68.57 | 39.75 | 65.11 | 74.55 | 83.38 | 82.80 | 103.98 | 161.22 |
| **2018** | 71.86 | 110.04 | 40.51 | 66.12 | 62.17 | ND | 80.58 | 99.62 | 133.52 |
| **2019** | 72.54 | 131.69 | ND | 44.18 | 116.64 | 56.88 | ND | 97.93 | 113.26 |
| **2020** | 70.97 | 51.82 | ND | 56.59 | 59.73 | 58.71 | ND | 88.26 | 119.62 |
| **2021** | 78.15 | 55.06 | 31.89 | 74.62 | 60.48 | 62.82 | ND | 84.64 | 128.89 |
| **2022** | 94.41 | 73.05 | ND | 66.20 | 67.62 | 65.52 | ND | 135.85 | 164.08 |

TABLE S2: Average annual concentration of PM2.5 during the years 2011 to 2022 by city (µg/m3) (ND: NO DATA)

| **Average annual concentration of PM2.5** | | | | | | | | | |
| --- | --- | --- | --- | --- | --- | --- | --- | --- | --- |
| **Year** | **Tehran (1)** | **Tabriz (2)** | **Shiraz (3)** | **Ilam (4)** | **Kermanshah (5)** | **Mashhad (6)** | **Zahedan (7)** | **Yazd (8)** | **Ahvaz (9)** |
| **2011** | 39.11 | ND | ND | ND | ND | ND | ND | ND | ND |
| **2012** | 37.17 | ND | ND | ND | ND | ND | ND | ND | ND |
| **2013** | 39.27 | 32.36 | ND | ND | ND | 34.83 | ND | ND | ND |
| **2014** | 35.31 | 19.64 | ND | ND | ND | 26.63 | ND | ND | 52.44 |
| **2015** | 34.58 | 23.66 | ND | ND | ND | 24.92 | ND | ND | 54.02 |
| **2016** | 33.45 | 26.93 | ND | ND | ND | 30.88 | ND | ND | 55.20 |
| **2017** | 33.79 | 23.74 | ND | ND | ND | 35.28 | ND | ND | 54.52 |
| **2018** | 27.95 | 19.22 | 29.98 | ND | ND | 34.15 | ND | ND | 45.88 |
| **2019** | 29.69 | 18.47 | 43.37 | 22.62 | ND | 31.31 | ND | ND | 38.01 |
| **2020** | 31.05 | 20.05 | 27.75 | ND | 19.98 | 29.97 | ND | ND | 44.81 |
| **2021** | 31.50 | 23.02 | 27.67 | ND | 16.52 | 30.47 | ND | ND | 43.56 |
| **2022** | 38.08 | 35.44 | 28.00 | ND | 23.79 | 31.29 | ND | 27.54 | 57.25 |

TABLE S3: The number of days with PM2.5 concentration higher than 15 µg/m3 of the total days with data (ND: NO DATA)

| The number of Days | | | | | | | | | |
| --- | --- | --- | --- | --- | --- | --- | --- | --- | --- |
| Year | **Tehran (1)** | **Tabriz (2)** | **Shiraz (3)** | **Ilam (4)** | **Kermanshah (5)** | **Mashhad (6)** | **Zahedan (7)** | **Yazd (8)** | **Ahvaz (9)** |
| 2011 | 323 | ND | ND | ND | ND | ND | ND | ND | ND |
| 2012 | 361 | ND | ND | ND | ND | ND | ND | ND | ND |
| 2013 | 365 | 185 | ND | ND | ND | 280 | ND | ND | ND |
| 2014 | 365 | 197 | ND | ND | ND | 323 | ND | ND | 207 |
| 2015 | 355 | 282 | ND | ND | ND | 342 | ND | ND | 219 |
| 2016 | 359 | 297 | ND | ND | ND | 344 | ND | ND | 298 |
| 2017 | 360 | 259 | ND | ND | ND | 359 | ND | ND | 322 |
| 2018 | 357 | 230 | 282 | ND | ND | 323 | ND | ND | 350 |
| 2019 | 347 | 211 | 249 | 257 | ND | 342 | ND | ND | 354 |
| 2020 | 346 | 220 | 311 | ND | 210 | 339 | ND | ND | 358 |
| 2021 | 359 | 267 | 271 | ND | 116 | 356 | ND | ND | 361 |
| 2022 | 361 | 257 | 286 | ND | 248 | 347 | ND | 207 | 289 |

TABLE S4: Percentage of days with PM2.5 concentration higher than 15 µg/m3 from all days with data (ND: NO DATA)

| The percentage of Days | | | | | | | | | |
| --- | --- | --- | --- | --- | --- | --- | --- | --- | --- |
| Year | **Tehran (1)** | **Tabriz (2)** | **Shiraz (3)** | **Ilam (4)** | **Kermanshah (5)** | **Mashhad (6)** | **Zahedan (7)** | **Yazd (8)** | **Ahvaz (9)** |
| 2011 | 98.78 | ND | ND | ND | ND | ND | ND | ND | ND |
| 2012 | 99.18 | ND | ND | ND | ND | ND | ND | ND | ND |
| 2013 | 100.00 | 73.71 | ND | ND | ND | 93.65 | ND | ND | ND |
| 2014 | 100.00 | 63.34 | ND | ND | ND | 88.49 | ND | ND | 100.00 |
| 2015 | 97.26 | 77.26 | ND | ND | ND | 93.70 | ND | ND | 100.00 |
| 2016 | 98.09 | 81.82 | ND | ND | ND | 93.99 | ND | ND | 100.00 |
| 2017 | 98.63 | 71.15 | ND | ND | ND | 98.36 | ND | ND | 98.77 |
| 2018 | 97.81 | 63.01 | 99.30 | ND | ND | 92.82 | ND | ND | 98.31 |
| 2019 | 95.07 | 57.81 | 96.51 | 87.12 | ND | 93.70 | ND | ND | 97.79 |
| 2020 | 94.54 | 60.11 | 92.28 | ND | 66.25 | 92.62 | ND | ND | 97.81 |
| 2021 | 98.36 | 73.15 | 96.10 | ND | 32.22 | 97.53 | ND | ND | 98.90 |
| 2022 | 98.90 | 70.41 | 88.54 | ND | 71.88 | 95.07 | ND | 88.84 | 99.66 |

TABLE S5: The number of days with PM10 concentration higher than 45 µg/m3 of the total days with data (ND: NO DATA)

| The number of days | | | | | | | | | |
| --- | --- | --- | --- | --- | --- | --- | --- | --- | --- |
| Year | **Tehran (1)** | **Tabriz (2)** | **Shiraz (3)** | **Ilam (4)** | **Kermanshah (5)** | **Mashhad (6)** | **Zahedan (7)** | **Yazd (8)** | **Ahvaz (9)** |
| 2011 | 350 | ND | ND | ND | 261 | ND | ND | ND | ND |
| 2012 | 350 | ND | ND | ND | ND | ND | ND | ND | ND |
| 2013 | 343 | ND | 276 | 253 | ND | ND | ND | 347 | 346 |
| 2014 | 323 | ND | 121 | 173 | ND | 282 | ND | 193 | 294 |
| 2015 | 323 | 94 | ND | 192 | 270 | 307 | ND | 336 | 258 |
| 2016 | 329 | 190 | ND | 210 | 298 | 294 | ND | 352 | 305 |
| 2017 | 343 | 276 | 76 | 198 | 293 | 270 | 312 | 327 | 332 |
| 2018 | 325 | 250 | 79 | 216 | 219 | ND | 278 | 350 | 341 |
| 2019 | 320 | 260 | ND | 134 | 266 | 241 | ND | 357 | 357 |
| 2020 | 303 | 164 | ND | 245 | 246 | 242 | ND | 338 | 350 |
| 2021 | 341 | 216 | 16 | 314 | 235 | 298 | ND | 308 | 360 |
| 2022 | 343 | 227 | ND | 265 | 252 | 264 | ND | 365 | 359 |

TABLE S6: Percentage of days with PM10 concentration higher than 45 µg/m3 from all days with data (ND: NO DATA)

| The Percentage of days | | | | | | | | | |
| --- | --- | --- | --- | --- | --- | --- | --- | --- | --- |
| Year | **Tehran (1)** | **Tabriz (2)** | **Shiraz (3)** | **Ilam (4)** | **Kermanshah (5)** | **Mashhad (6)** | **Zahedan (7)** | **Yazd (8)** | **Ahvaz (9)** |
| 2011 | 96.15 | ND | ND | ND | 91.26 | ND | ND | ND | ND |
| 2012 | 95.63 | ND | ND | ND | ND | ND | ND | ND | ND |
| 2013 | 93.97 | ND | 91.09 | 69.51 | ND | ND | ND | 95.86 | 99.43 |
| 2014 | 88.49 | ND | 38.41 | 48.87 | ND | 80.57 | ND | 92.79 | 99.66 |
| 2015 | 88.49 | 48.70 | ND | 53.33 | 79.41 | 84.11 | ND | 97.11 | 98.85 |
| 2016 | 89.89 | 52.92 | ND | 57.38 | 81.64 | 80.33 | ND | 96.44 | 99.67 |
| 2017 | 93.97 | 75.62 | 23.82 | 67.12 | 80.27 | 90.00 | 91.23 | 98.20 | 99.70 |
| 2018 | 89.04 | 68.49 | 32.24 | 61.02 | 61.69 | ND | 84.24 | 96.69 | 98.27 |
| 2019 | 87.67 | 71.23 | ND | 37.22 | 88.08 | 66.03 | ND | 97.81 | 98.35 |
| 2020 | 82.79 | 44.81 | ND | 67.87 | 67.21 | 66.12 | ND | 94.15 | 95.63 |
| 2021 | 93.42 | 59.18 | 6.18 | 87.47 | 64.38 | 81.64 | ND | 85.79 | 98.63 |
| 2022 | 93.97 | 62.53 | ND | 73.82 | 69.04 | 72.33 | ND | 100.00 | 98.36 |

TABLE S7: Number of days with PM2.5 and PM10 concentrations higher than respectively 150 and 35 µg/m3 (ND: NO DATA)

| The number of days with PM2.5 and PM10 concentration higher than the National Standard of Iran | | | | | | | | | | | | | | | | | | |
| --- | --- | --- | --- | --- | --- | --- | --- | --- | --- | --- | --- | --- | --- | --- | --- | --- | --- | --- |
| Year | **Tehran (1)** | | **Tabriz (2)** | | **Shiraz (3)** | | **Ilam (4)** | | **Kermanshah (5)** | | **Mashhad (6)** | | **Zahedan (7)** | | **Yazd (8)** | | **Ahvaz (9)** | |
| PM10 | PM2.5 | PM10 | PM2.5 | PM10 | PM2.5 | PM10 | PM2.5 | PM10 | PM2.5 | PM10 | PM2.5 | PM10 | PM2.5 | PM10 | PM2.5 | PM10 | PM2.5 |
| 2011 | 89 | 291 | ND | ND | ND | ND | ND | ND | 191 | ND | ND | ND | ND | ND | ND | ND | ND | ND |
| 2012 | 48 | 328 | ND | ND | ND | ND | ND | ND | ND | ND | ND | ND | ND | ND | ND | ND | ND | ND |
| 2013 | 65 | 322 | ND | 175 | 70 | ND | 100 | ND | ND | ND | ND | 230 | ND | ND | 265 | ND | 316 | ND |
| 2014 | 48 | 277 | ND | 122 | 14 | ND | 54 | ND | ND | ND | 94 | 213 | ND | ND | 133 | ND | 225 | 200 |
| 2015 | 65 | 279 | 19 | 169 | ND | ND | 63 | ND | 149 | ND | 130 | 199 | ND | ND | 204 | ND | 220 | 209 |
| 2016 | 41 | 280 | 77 | 202 | ND | ND | 66 | ND | 185 | ND | 121 | 257 | ND | ND | 204 | ND | 251 | 293 |
| 2017 | 56 | 293 | 117 | 179 | 23 | ND | 56 | ND | 120 | ND | 100 | 318 | 129 | ND | 215 | ND | 273 | 319 |
| 2018 | 23 | 220 | 230 | 139 | 12 | 251 | 79 | ND | 50 | ND | ND | 302 | 82 | ND | 154 | ND | 278 | 334 |
| 2019 | 44 | 240 | 199 | 101 | ND | 203 | 19 | 236 | 184 | ND | 41 | 250 | ND | ND | 169 | ND | 264 | 324 |
| 2020 | 40 | 230 | 81 | 131 | ND | 212 | 41 | ND | 71 | 111 | 42 | 232 | ND | ND | 115 | ND | 248 | 317 |
| 2021 | 64 | 232 | 81 | 133 | 11 | 188 | 114 | ND | 65 | 70 | 26 | 227 | ND | ND | 119 | ND | 265 | 336 |
| 2022 | 93 | 310 | 72 | 193 | ND | 203 | 99 | ND | 75 | 156 | 63 | 240 | ND | ND | 203 | 184 | 297 | 282 |

TABLE S8: The percentage of days with PM2.5 and PM10 concentrations higher than respectively 150 and 35 µg/m3 (ND: NO DATA)

| The percentage of days with PM2.5 and PM10 concentration higher than the National Standard of Iran | | | | | | | | | | | | | | | | | | |
| --- | --- | --- | --- | --- | --- | --- | --- | --- | --- | --- | --- | --- | --- | --- | --- | --- | --- | --- |
| Year | **Tehran (1)** | | **Tabriz (2)** | | **Shiraz (3)** | | **Ilam (4)** | | **Kermanshah (5)** | | **Mashhad (6)** | | **Zahedan (7)** | | **Yazd (8)** | | **Ahvaz (9)** | |
| **PM10** | **PM2.5** | **PM10** | **PM2.5** | **PM10** | **PM2.5** | **PM10** | **PM2.5** | **PM10** | **PM2.5** | **PM10** | **PM2.5** | **PM10** | **PM2.5** | **PM10** | **PM2.5** | **PM10** | **PM2.5** |
| 2011 | 24.45 | 88.99 | ND | ND | ND | ND | ND | ND | 66.78 | ND | ND | ND | ND | ND | ND | ND | ND | ND |
| 2012 | 13.11 | 90.11 | ND | ND | ND | ND | ND | ND | ND | ND | ND | ND | ND | ND | ND | ND | ND | ND |
| 2013 | 17.81 | 88.22 | ND | 69.72 | 23.10 | ND | 27.47 | ND | ND | ND | ND | 76.92 | ND | ND | 73.20 | ND | 90.80 | ND |
| 2014 | 13.15 | 75.89 | ND | 39.61 | 4.44 | ND | 15.25 | ND | ND | ND | 26.86 | 58.36 | ND | ND | 63.94 | ND | 76.27 | 96.62 |
| 2015 | 17.81 | 76.44 | 9.90 | 46.30 | ND | ND | 17.50 | ND | 43.82 | ND | 35.62 | 54.52 | ND | ND | 58.96 | ND | 84.29 | 95.43 |
| 2016 | 11.20 | 76.50 | 21.57 | 55.49 | ND | ND | 18.03 | ND | 50.68 | ND | 33.06 | 70.22 | ND | ND | 55.89 | ND | 82.03 | 98.32 |
| 2017 | 15.34 | 80.27 | 32.05 | 49.18 | 7.21 | ND | 18.98 | ND | 32.88 | ND | 33.33 | 87.12 | 37.72 | ND | 64.56 | ND | 81.98 | 97.85 |
| 2018 | 6.30 | 60.27 | 63.01 | 38.08 | 4.90 | 88.38 | 22.32 | ND | 14.08 | ND | ND | 86.78 | 24.85 | ND | 42.54 | ND | 80.12 | 93.82 |
| 2019 | 12.05 | 65.75 | 54.52 | 27.67 | ND | 78.68 | 5.28 | 80.00 | 60.93 | ND | 11.23 | 68.49 | ND | ND | 46.30 | ND | 72.73 | 89.50 |
| 2020 | 10.93 | 62.84 | 22.13 | 35.79 | ND | 62.91 | 11.36 | ND | 19.40 | 35.02 | 11.48 | 63.39 | ND | ND | 32.03 | ND | 67.76 | 86.61 |
| 2021 | 17.53 | 63.56 | 22.19 | 36.44 | 4.25 | 66.67 | 31.75 | ND | 17.81 | 19.44 | 7.12 | 62.19 | ND | ND | 33.15 | ND | 72.60 | 92.05 |
| 2022 | 25.48 | 84.93 | 19.83 | 52.88 | ND | 62.85 | 27.58 | ND | 20.55 | 45.22 | 17.26 | 65.75 | ND | ND | 55.62 | 78.97 | 81.37 | 97.24 |

Figure S1: Change trend of average annual concentration of PM10 during the years 2011 to 2022 by city

(A= Tehran, B= Tabriz, C= Shiraz, D= Ilam, E= Kermanshah, F= Mashhad, G= Zahedan, H= Yazd, I= Ahvaz)

Figure S2: Change trend of average annual concentration of PM2.5 during the years 2011 to 2022 by city (ND: NO DATA)

(A= Tehran, B= Tabriz, C= Shiraz, D= Ilam, E= Kermanshah, F= Mashhad, G= Zahedan, H= Yazd, I= Ahvaz)

TABLE S9: The count of SDS hours throughout the years 2011 to 2022 by city (ND: NO DATA)

| The count of SDS hours | | | | | | | | | |
| --- | --- | --- | --- | --- | --- | --- | --- | --- | --- |
| Year | **Tehran** | **Tabriz** | **Shiraz** | **Ilam** | **Kermanshah** | **Mashhad** | **Zahedan** | **Yazd** | **Ahvaz** |
| 2011 | 398 | ND | ND | ND | 1470 | ND | ND | ND | ND |
| 2012 | 344 | ND | ND | ND | ND | ND | ND | ND | ND |
| 2013 | 335 | ND | 364 | 570 | ND | ND | ND | 1289 | 3588 |
| 2014 | 297 | ND | 47 | 380 | ND | 1270 | ND | 557 | 1856 |
| 2015 | 328 | 71 | ND | 528 | 1107 | 2867 | ND | 1038 | 2464 |
| 2016 | 179 | 489 | ND | 412 | 994 | 741 | ND | 1166 | 2294 |
| 2017 | 400 | 1447 | 253 | 265 | 492 | 650 | 669 | 1087 | 2562 |
| 2018 | 119 | 2465 | 22 | 429 | 324 | ND | 514 | 933 | 2476 |
| 2019 | 169 | 3361 | ND | 73 | 1893 | 181 | ND | 1030 | 2050 |
| 2020 | 256 | 444 | ND | 160 | 294 | 195 | ND | 655 | 2164 |
| 2021 | 317 | 671 | 30 | 556 | 324 | 155 | ND | 651 | 2313 |
| 2022 | 749 | 661 | ND | 324 | 418 | 528 | ND | 1656 | 3551 |
| Total SDS hours throughout the years 2011 to 2022 | 3891 | 9609 | ND | 3697 | 7316 | 6587 | ND | 10062 | 25318 |
| Total SDS hours throughout the years 2017 to 2022 | 2010 | 9049 | ND | 1807 | 3745 | 1709 | ND | 6012 | 15116 |
| Total SDS hours throughout the years 2020 to 2022 | 1322 | 1776 | ND | 1040 | 1036 | 878 | ND | 2962 | 8028 |

Figure S3: The total count and change trend of SDS hours in all cities per year

**SDS Hours:**
Based on the findings mentioned in TABLE S9, different results can be obtained for each city.

1. Tehran:
   It has been observed that from 2011 to 2022, the highest number of hours was recorded in 2022, with a total of 749 hours. On the one hand, Chart 3-7 shows that the trend in the number of SDS hours has been decreasing from 2011 to 2018 (except for the years 2015 and 2017, which had an increasing trend). However, unfortunately, from 2018 to 2022, despite advancements in science and technology, we have witnessed an increasing trend in dust storm hours (PM10 and PM2.5), which indicates the poor air quality situation in the city of Tehran.
2. Mashhad:
   From 2011 to 2022, the highest number of hours was recorded in 2015, with a total of 2,867 hours. On the one hand, Chart 3-17 shows that despite fluctuations, the trend of the concentration of pollutants causing SDS has been generally decreasing from 2016 to 2021 (except for the year 2018, for which there is no data). However, unfortunately, from 2021 to 2022, despite advancements in science and technology, we have witnessed an increasing trend in the concentration of these pollutants that cause dust storms (PM10 and PM2.5), which indicates the poor air quality situation in the city of Mashhad in 2022.
3. Tabriz:
   From 2011 to 2022, the highest number of hours was recorded in 2019, with a total of 3,361 hours. On the one hand, Chart 3-27 shows that the trend of the concentration of pollutants causing SDS increased from 2015 to 2019; then this trend was accompanied by a significant decrease in 2020, and finally, it increased again in 2021. This trend reached around 660 hours in 2022. Between the years 2011 and 2022, the concentration of pollutants that cause dust storms (PM10 and PM2.5) has fluctuated, indicating an unfavorable and unstable air quality situation in the city of Tabriz over the past 12 years.
4. Ilam:
   From 2011 to 2022, the highest number of hours were recorded in the years 2013, 2015, and 2021, with 570, 528, and 556 hours respectively. On the one hand, Chart 3-37 shows that the trend of pollutant concentrations causing SDS from 2013 to 2022 has been fluctuating, and unfortunately, the air pollution situation in Ilam during these years, attributed to PM10 and PM2.5 pollutants that cause dust storms, has not been favorable. (It is worth mentioning that in 2011 and 2012, the city of Ilam lacked an air quality monitoring station, and therefore, these years are without data.)
5. Kermanshah:
   From 2011 to 2022, the highest number of hours was recorded in 2019, with a total of 1,893 hours. On the one hand, Chart 3-46 shows that the trend of pollutant concentrations causing SDS has been decreasing from 2011 to 2018 (except for the years 2012 to 2014, which lacked data). However, unfortunately, in 2019, we witnessed a significant increase in the number of stormy hours, and subsequently, from 2020 onwards, after a decrease in this amount, we have again observed an upward trend. This indicates a very poor air quality situation in the city of Kermanshah over the past four years.
6. Yazd:
   From 2013 to 2022, the highest number of hours was recorded in 2022, with a total of 1,656 hours. On the one hand, Chart 3-56 shows that the trend of the concentration of pollutants causing SDS has fluctuated and can even be described as increasing from 2013 to 2022. In all these years, the number of storm hours in the city of Yazd has consistently exceeded 550 hours per year, which can be attributed to the desert nature of Yazd province and its low humidity.
7. Zahedan:
   In the city of Zahedan, from 2011 to 2022, the stations recorded sufficient data only for the years 2017 and 2018, during which the number of storm hours exceeded 500 in both years.
8. Shiraz:
   From 2011 to 2022, the year with the highest number of recorded hours was 2013, with a total of 364 hours. On the other hand, due to the inconsistency in data recording over the years, Chart 3-71 cannot be considered a basis for examining the trend of storms over different years.
9. Ahvaz:
   From 2011 to 2022, the highest number of hours was recorded in 2013, with a total of 3,588 hours. On the one hand, Chart 3-83 shows that the trend of the concentration of pollutants causing SDS from 2014 to 2022 has been on the rise, despite fluctuations and advancements in science and technology. This indicates the poor air quality situation in the city of Ahvaz during these years, particularly in 2022, as evidenced by the increasing concentrations of these dust storm-inducing pollutants (PM10 and PM2.5).

TABLE S10: The count of SDS days throughout the years 2011 to 2022 by city (ND: NO DATA)

| The count of SDS days throughout the years 2011 to 2022 | | | | | | | | | |
| --- | --- | --- | --- | --- | --- | --- | --- | --- | --- |
| Year | **Tehran** | **Tabriz** | **Shiraz** | **Ilam** | **Kermanshah** | **Mashhad** | **Zahedan** | **Yazd** | **Ahvaz** |
| 2011 | 0 | ND | ND | ND | 16 | ND | ND | ND | ND |
| 2012 | 1 | ND | ND | ND | ND | ND | ND | ND | ND |
| 2013 | 0 | ND | 0 | 7 | ND | ND | ND | 4 | 66 |
| 2014 | 2 | ND | 1 | 2 | ND | 1 | ND | 2 | 25 |
| 2015 | 1 | 0 | ND | 10 | 24 | 0 | ND | 9 | 23 |
| 2016 | 0 | 24 | ND | 7 | 13 | 2 | ND | 9 | 17 |
| 2017 | 0 | 9 | 0 | 2 | 5 | 4 | 5 | 6 | 39 |
| 2018 | 0 | 37 | 0 | 6 | 4 | ND | 7 | 10 | 22 |
| 2019 | 0 | 44 | ND | 0 | 11 | 0 | ND | 7 | 5 |
| 2020 | 0 | 5 | ND | 2 | 1 | 0 | ND | 5 | 12 |
| 2021 | 0 | 1 | 4 | 6 | 1 | 0 | ND | 7 | 19 |
| 2022 | 8 | 8 | ND | 4 | 5 | 0 | ND | 8 | 39 |
| Total SDS days throughout the years 2011 to 2022 | 12 | 128 | ND | 46 | 80 | 7 | ND | 67 | 267 |
| Total SDS days throughout the years 2017 to 2022 | 8 | 104 | ND | 20 | 27 | 4 | ND | 43 | 136 |
| Total SDS days throughout the years 2020 to 2022 | 8 | 14 | ND | 12 | 7 | 0 | ND | 20 | 70 |

Figure S4: The total count and change trend of SDS days in all cities per year

**SDS Days:**

Based on the findings mentioned in TABLE S10, different results can be obtained for each city.

1. Tehran:

The number of days that the city of Tehran was continuously exposed to dust storms for 24 hours in 2022 reached 8 days, making it a leader compared to other years. Additionally, the trend of changes in Chart 3-10 also indicates a decreasing trend in 24-hour storms until 2021, but in 2022, this trend suddenly increased, which indicates a deterioration in air quality in that year.

1. Mashhad:

The number of days that the city of Mashhad has been continuously exposed to dust storms 24 hours a day has been recorded as follows: in 2017, there were 4 full days, in 2016, 2 full days, and in 2014, 1 full day. From 2019 to 2022, the city of Mashhad was not continuously exposed to dust storms 24 hours a day; therefore, the storms were mostly hourly.

1. Tabriz:

In 2019, there were 44 full days recorded, in 2018 there were 37 full days, and in 2016 there were 24 full days. In other years with available data, the city of Tabriz was exposed to dust storms for less than 10 days a year continuously and 24 hours a day, and therefore the storms were mostly hourly.

1. Ilam:

The number of days that the city of Ilam has been continuously exposed to dust storms 24 hours a day has been recorded, with 10 full days in 2015 and 7 full days in both 2013 and 2016 being higher than in other years. In other years, the city of Ilam has still been continuously exposed to dust storms for at least 2 full days 24 hours a day. However, in 2019, this city was not continuously exposed to these storms for any 24-hour period, and most of its storms were hourly and transient. It is worth mentioning that, as stated above, this city did not have a station for recording air quality in the years 2011 and 2012.

1. Kermanshah:

The highest number of consecutive days that the city of Kermanshah has been continuously exposed to dust storms, recorded in 2015, was 24 hours a day for 24 days. The results indicate that the number of stormy days has been declining from this year until 2018, and then faced a surge in 2019. It is interesting to note that in 2019, Kermanshah experienced the highest number of stormy hours, despite having only 11 stormy days. In the three years leading up to 2022, this number has also increased, indicating a worsening concentration of pollutants.

1. Yazd:

The number of days that the city of Yazd has been continuously and 24 hours exposed to dust storms was recorded as 10 days in 2018. Interestingly, the results indicate that in the years 2017, 2014, and 2020, there were fewer stormy days compared to the years before and after. Ultimately, in the two-year period leading up to 2022, there has been an increasing trend both hourly and daily. In terms of hours, the year 2022 was significantly more polluted compared to other years; however, this year only experienced 8 consecutive 24-hour stormy conditions.

1. Zahedan:

The number of days that the city of Zahedan has been continuously exposed to dust storms 24 hours a day, in both years for which data is available for 2017 and 2018, was recorded as 2 days and nights, while in the years 2014 and 2017, it was recorded as 5 and 7 days and nights, respectively.

1. Shiraz:

In the 12-year period from 2011 to 2022, excluding the years without valid data, the highest number of days that the city of Shiraz was continuously exposed to dust storms for 24 hours was in 2021, with a record of 4 consecutive days. Following that, in 2014, there was 1 stormy day. Ultimately, it has been determined that the city of Shiraz experienced no stormy days in the years 2013, 2017, and 2018. The results of Chart 3-74 indicate that despite the lack of available data for the year 2022, in the city of Shiraz, the trend of the number of stormy days in the year preceding 2022 has been upward. In 2017, despite the fact that the city of Shiraz had not experienced a continuous storm for 24 hours, it recorded the highest number of storm hours in the five-year period leading up to 2022.

1. Ahvaz:

The highest number of days that the city of Ahvaz has been continuously exposed to dust storms for 24 hours was in 2013, with a record of 66 days. This was followed by 33 days in both 2022 and 2017. Additionally, from 2013 to 2022, there were at least 10 days each year with dust storms in the city of Ahvaz, except for 2019, which had 5 stormy days throughout the year.

TABLE S11: Maximum and Minimum Daily concentration of PM10 during the years 2011 to 2022 by city µg/m3 (ND: NO DATA)

| Daily concentration of PM10 | | | | | | | | | | | | | | | | | | |
| --- | --- | --- | --- | --- | --- | --- | --- | --- | --- | --- | --- | --- | --- | --- | --- | --- | --- | --- |
| **City** | **Tehran (1)** | | **Tabriz (2)** | | **Shiraz (3)** | | **Ilam (4)** | | **Kermanshah (5)** | | **Mashhad (6)** | | **Zahedan (7)** | | **Yazd (8)** | | **Ahvaz (9)** | |
| **Year** | **max** | **min** | **max** | **min** | **max** | **min** | **max** | **min** | **max** | **min** | **max** | **min** | **max** | **min** | **max** | **min** | **max** | **min** |
| **2011** | 227.9 | 31.1 | ND | ND | ND | ND | ND | ND | 953.6 | 21.7 | ND | ND | ND | ND | ND | ND | ND | ND |
| **2012** | 309.6 | 22.3 | ND | ND | ND | ND | ND | ND | ND | ND | ND | ND | ND | ND | ND | ND | ND | ND |
| **2013** | 205.3 | 27.8 | ND | ND | 188.7 | 13.2 | 490.6 | 8.6 | ND | ND | ND | ND | ND | ND | 481.5 | 24.1 | 824.0 | 42.5 |
| **2014** | 274.3 | 19.6 | ND | ND | 318.6 | 11.7 | 521.8 | 11.3 | ND | ND | 419.2 | 11.3 | ND | ND | 335.1 | 25.8 | 796.5 | 34.1 |
| **2015** | 255.4 | 22.5 | 368.5 | 6.0 | ND | ND | 590.0 | 11.3 | 602.1 | 11.5 | 248.7 | 15.2 | ND | ND | 331.9 | 30.9 | 582.7 | 39.5 |
| **2016** | 180.0 | 23.8 | 1464.0 | 7.9 | ND | ND | 629.4 | 9.0 | 785.9 | 17.8 | 383.7 | 12.0 | ND | ND | 513.0 | 21.7 | 1010.6 | 43.4 |
| **2017** | 210.9 | 24.0 | 497.4 | 7.0 | 195.0 | 7.4 | 516.9 | 5.0 | 590.0 | 17.3 | 506.8 | 15.0 | 413.4 | 21.9 | 625.5 | 20.1 | 1138.6 | 44.0 |
| **2018** | 177.3 | 25.6 | 461.6 | 14.1 | 108.7 | 10.6 | 711.0 | 7.6 | 648.4 | 11.8 | ND | ND | 377.7 | 8.2 | 500.9 | 18.4 | 707.1 | 18.5 |
| **2019** | 166.7 | 23.5 | 550.5 | 15.1 | ND | ND | 248.1 | 17.5 | 280.0 | 9.8 | 229.6 | 14.0 | ND | ND | 490.1 | 28.4 | 400.6 | 16.6 |
| **2020** | 179.1 | 14.4 | 291.1 | 14.3 | ND | ND | 439.5 | 7.1 | 260.6 | 11.5 | 204.3 | 9.0 | ND | ND | 417.7 | 5.1 | 452.0 | 19.1 |
| **2021** | 189.2 | 19.9 | 301.8 | 12.3 | 1000.0 | 6.0 | 619.5 | 6.8 | 328.1 | 13.6 | 207.1 | 15.8 | ND | ND | 522.9 | 23.7 | 720.4 | 30.4 |
| **2022** | 575.9 | 28.6 | 490.5 | 13.7 | ND | ND | 763.8 | 14.8 | 752.3 | 13.0 | 249.3 | 14.5 | ND | ND | 453.0 | 51.4 | 1126.8 | 26.9 |

TABLE S12: Maximum and Minimum Daily concentration of PM2.5 during the years 2011 to 2022 by city µg/m3 (ND: NO DATA)

| Daily concentration of PM2.5 | | | | | | | | | | | | | | | | | | |
| --- | --- | --- | --- | --- | --- | --- | --- | --- | --- | --- | --- | --- | --- | --- | --- | --- | --- | --- |
| **City** | **Tehran (1)** | | **Tabriz (2)** | | **Shiraz (3)** | | **Ilam (4)** | | **Kermanshah (5)** | | **Mashhad (6)** | | **Zahedan (7)** | | **Yazd (8)** | | **Ahvaz (9)** | |
| **Year** | **max** | **min** | **max** | **min** | **max** | **min** | **max** | **min** | **max** | **min** | **max** | **min** | **max** | **min** | **max** | **min** | **max** | **min** |
| **2011** | 114.4 | 7.6 | ND | ND | ND | ND | ND | ND | ND | ND | ND | ND | ND | ND | ND | ND | ND | ND |
| **2012** | 139.1 | 10.3 | ND | ND | ND | ND | ND | ND | ND | ND | ND | ND | ND | ND | ND | ND | ND | ND |
| **2013** | 78.6 | 17.3 | 181.9 | 6.3 | ND | ND | ND | ND | ND | ND | 279.9 | 8.5 | ND | ND | ND | ND | ND | ND |
| **2014** | 101.3 | 15.0 | 64.4 | 5.8 | ND | ND | ND | ND | ND | ND | 103.9 | 7.8 | ND | ND | ND | ND | 275.7 | 17.2 |
| **2015** | 93.2 | 9.4 | 87.6 | 8.8 | ND | ND | ND | ND | ND | ND | 56.7 | 8.7 | ND | ND | ND | ND | 253.8 | 15.2 |
| **2016** | 83.7 | 9.8 | 113.1 | 8.7 | ND | ND | ND | ND | ND | ND | 102.8 | 7.6 | ND | ND | ND | ND | 273.5 | 19.3 |
| **2017** | 114.1 | 11.0 | 90.3 | 6.9 | ND | ND | ND | ND | ND | ND | 109.7 | 11.9 | ND | ND | ND | ND | 321.6 | 10.0 |
| **2018** | 69.0 | 12.7 | 86.0 | 7.0 | 239.6 | 10.5 | ND | ND | ND | ND | 183.1 | 7.7 | ND | ND | ND | ND | 318.6 | 9.4 |
| **2019** | 85.9 | 11.1 | 53.5 | 8.6 | 298.7 | 12.7 | 91.7 | 8.9 | ND | ND | 105.0 | 10.1 | ND | ND | ND | ND | 137.8 | 9.5 |
| **2020** | 96.8 | 8.5 | 74.1 | 8.3 | 160.4 | 10.3 | ND | ND | 105.0 | 7.8 | 92.0 | 7.6 | ND | ND | ND | ND | 197.9 | 11.3 |
| **2021** | 82.9 | 12.1 | 84.1 | 7.6 | 115.2 | 8.8 | ND | ND | 241.7 | 5.2 | 90.2 | 11.5 | ND | ND | ND | ND | 173.2 | 10.0 |
| **2022** | 145.1 | 13.8 | 219.3 | 7.0 | 203.6 | 7.1 | ND | ND | 279.5 | 6.8 | 116.2 | 10.2 | ND | ND | 94.1 | 10.8 | 405.5 | 14.9 |

TABLE S13 :  Slope's Sen of annual PM10 and PM2.5 and count of SDS days and hours changes by year

| City | Year | Mean | | Count | |
| --- | --- | --- | --- | --- | --- |
| PM10 | PM2.5 | SDS Hours | SDS Days |
| Tehran | 2011 - 2018 | -2.31 | -1.13 | -32.58 | 0 |
| 2018 - 2022 | 4.22 | 1.65 | 80.5 | 0 |
| 2020 - 2022 | 11.72 | 3.51 | 246.5 | 4 |
| Tabriz | 2013 - 2015 | NA | -4.35 | NA | NA |
| 2015 - 2020 | 15.37 | -1.3 | 798 | 6.5 |
| 2020 - 2022 | 10.62 | 7.7 | 108.5 | 1.5 |
| Shiraz | 2013 - 2014 | -32.93 | NA | -317 | 1 |
| 2017 - 2018 | 0.76 | NA | -231 | 0 |
| 2018 - 2020 | NA | -1.12 | NA | NA |
| 2020 - 2022 | NA | 0.12 | NA | NA |
| Ilam | 2013 - 2018 | -0.42 | NA | -33 | -0.2 |
| 2014 - 2018 | 1.43 | NA | -12.25 | -0.25 |
| 2018 - 2022 | 3.82 | NA | 62.17 | 0.5 |
| 2020 - 2022 | 4.8 | NA | 82 | 1 |
| Kermanshah | 2012 - 2014 | NA | NA | NA | NA |
| 2015 - 2019 | -8.37 | NA | -140.5 | -3.88 |
| 2019 - 2020 | -56.9 | NA | -1599 | -10 |
| 2018 - 2019 | 54.47 | NA | 1569 | 7 |
| 2020 - 2022 | 3.94 | 1.9 | 62 | 2 |
| Mashhad | 2014 - 2017 | 2.27 | 3.64 | -235.58 | 1.5 |
| 2017 - 2019 | -13.25 | -1.99 | NA | NA |
| 2019 - 2022 | 2.92 | 0.25 | 64.83 | 0 |
| 2020 - 2022 | 3.41 | 0.66 | 166.5 | 0 |
| Zahedan | 2017 - 2018 | -2.22 | -2.22 | -155 | 2 |
| Yazd | 2013 - 2016 | 3.68 | NA | 43.5 | 2.08 |
| 2016 - 2020 | -3.6 | NA | -122.13 | -0.83 |
| 2020 - 2022 | 23.79 | NA | 500.5 | 1.5 |
| Ahvaz | 2013 - 2014 | -39.75 | NA | -1732 | -41 |
| 2014 - 2016 | 3.99 | 1.38 | 219 | -4 |
| 2016 - 2020 | -9.43 | -3.95 | -83.67 | -4.5 |
| 2020 - 2022 | 22.23 | 6.22 | 693.5 | 13.5 |

According to the results, Tehran shows a negative trend from 2011 to 2022 (TABLE 1) in total and particularly from 2011 to 2018 (TABLE S13). However, this trend continues to rise from 2018 to 2022, particularly in the three years preceding 2022 (Figure S1 & S2).

Between 2015 and 2020, Tabriz showed a positive trend in PM10, SDS hours and days contrasting with PM2.5 trends. However, by 2022, all variables showed an upward trajectory with a positive slope (TABLE S13).

Shiraz's station data showed a decline in PM10 and SDS hours from 2013 to 2014 and an increase from 2017 to 2018, but a positive trend in PM2.5 from 2018 to 2022, indicating a shift from negative trends in the initial timeframe to positive trends in the subsequent timeframe (TABLE S13).

Ilam's PM10 concentration has consistently increased from 2014 to 2022, with intensified changes in recent years. The city's valid station data for PM2.5 was only available in 2019 during the 12-year research period, making trend calculation impossible (TABLE S13).

Kermanshah experienced a negative trend from 2015 to 2020, then increased from 2020 to 2022. However, reliable PM2.5 data only shows positive and ascendant changes in concentration for the three years before 2022 (TABLE S13). However, Kermanshah has a positive trend in total from 2011 to 2022 for PM10 (TABLE 1).

Mashhad experienced a significant increase in annual PM10 and PM2.5 and SDS days concentrations from 2014 to 2022, while a decline was observed from 2017 to 2019 (TABLE S13).

Zahedan possessed reliable station data for PM10 solely during the years 2017 and 2018, whereas it lacked PM2.5 data; over this timeframe, it had a negative and declining trend (TABLE S13).

The 12-year investigation in Yazd revealed that PM2.5 data was only available in 2022, making the trend of changes uncertain. However, other variables showed an upward trajectory from 2013 to 2016, followed by a downward trend from 2016 to 2020, with the peak of increasing trends occurring between 2020 and 2022 (TABLE S13).

The study investigates negative changes in all variables except for PM2.5 between 2013 to 2014 in Ahvaz. The period from 2014 to 2016 showed an increase except for dust days, followed by a decrease from 2016 to 2020, and finally an upward trend in the three years before 2022 (TABLE S13).
